# Supplementary material for: TORC2 mediates the heat stress response in Drosophila by promoting the formation of stress granules
Source: PubMed Central journal article supplement (PMC4510851; doi:10.1242/jcs.168724), 2015-07-15
Supplement: supp_jcs.168724_JCS168724supp.pdf [file supp_jcs.168724_JCS168724supp.pdf]

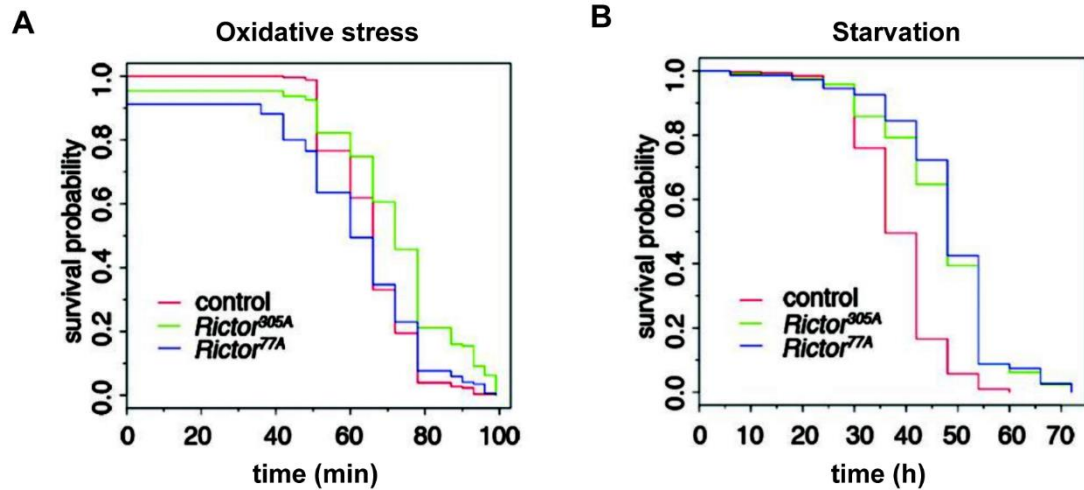

**Suppl. Figure S1: TORC2 mutant flies are not sensitive to oxidative stress or starvation.**

**A:** Quantitation of the sensitivity to oxidative stress (5% H<sub>2</sub>O<sub>2</sub>) of control flies (1A, n= 257), *Rictor<sup>77A</sup>* (n=170) and *Rictor<sup>305A</sup>* (n=175) expressed as the probability of surviving. p for *Rictor<sup>77A</sup>* and 305A vs. control is not statistically significant.

**B:** Quantitation of the sensitivity to complete starvation of control flies (1A, n=313), *Rictor<sup>77A</sup>* (n=148), *Rictor<sup>305A</sup>* (n=241) expressed as probability of surviving. p-value for *Rictor* vs. control is p<0.001.

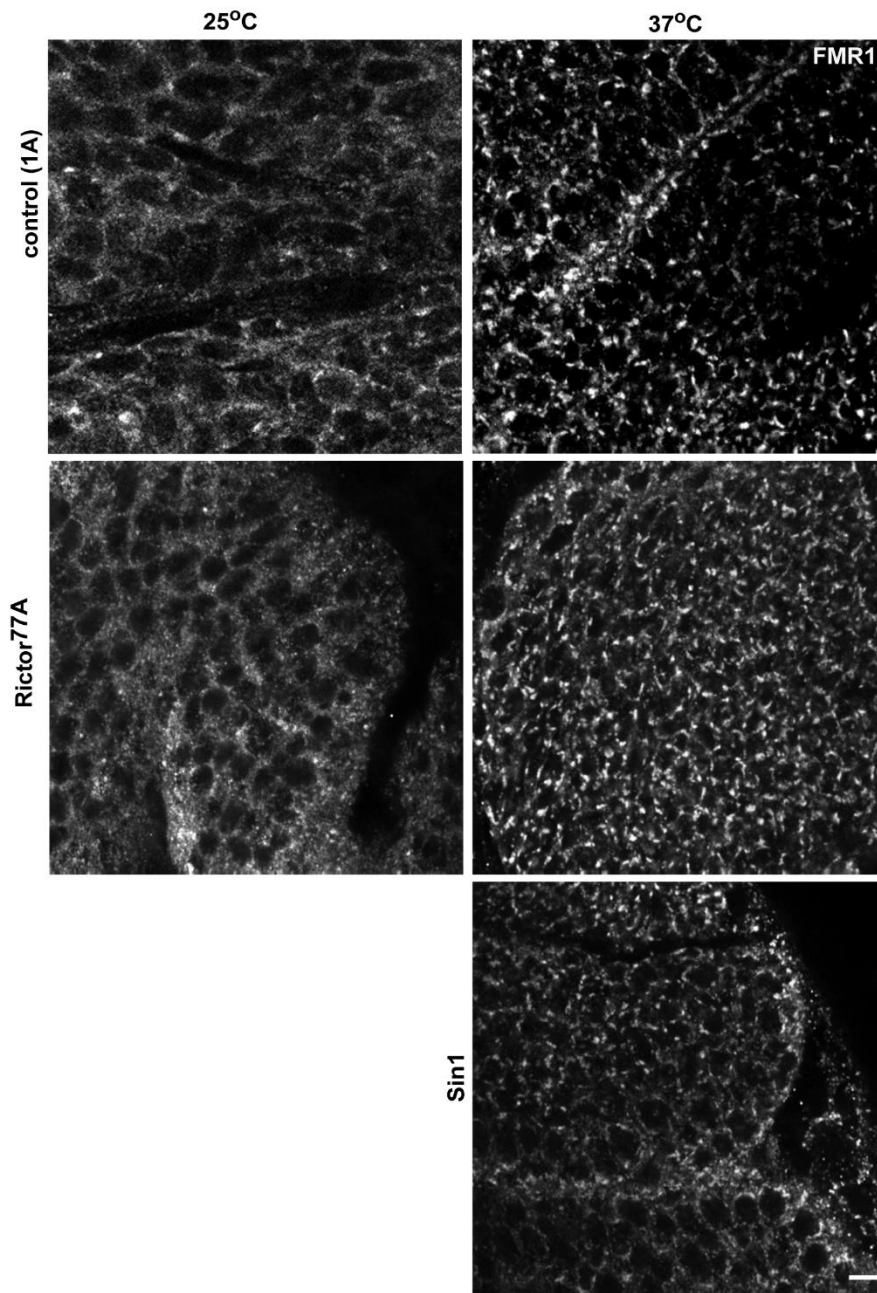

**Suppl. Figure S2: Stress granule formation in larval brain does not appear to depend on TORC2.** Immunofluorescence visualisation of FMR1 in larval brains after 2h at 26 and 37°C. Note that a pattern consistent with stress granule formation forms in heat stressed brains, but in control (1A), Rictor and Sin1 mutant to the same extent. Scale bar: 50um
